# Supplementary material for: Novel metal doped carbon quantum dots/CdS composites for efficient photocatalytic hydrogen evolution
Source: Royal Society of Chemistry journal article supplement (doi:10.1039/c8nr05807e), 2018-09-28
Supplement: c8nr05807e1.pdf [file c8nr05807e1.pdf]

## Supplementary Material

### Novel metal doped carbon quantum dots/CdS composites for efficient photocatalytic hydrogen evolution

Yajun Wang, Juan Chen, Liming Liu, Xiaoxu Xi, Yuming Li, Zhouliang Geng,  
Guiyuan Jiang\*

State Key Laboratory of Heavy Oil Processing, China University of Petroleum,  
Beijing 102249, China.

\*Corresponding author: Guiyuan Jiang, jianggy@cup.edu.cn, Tel: +86-10-8973-9125,  
Fax: +86-10-6972-4721

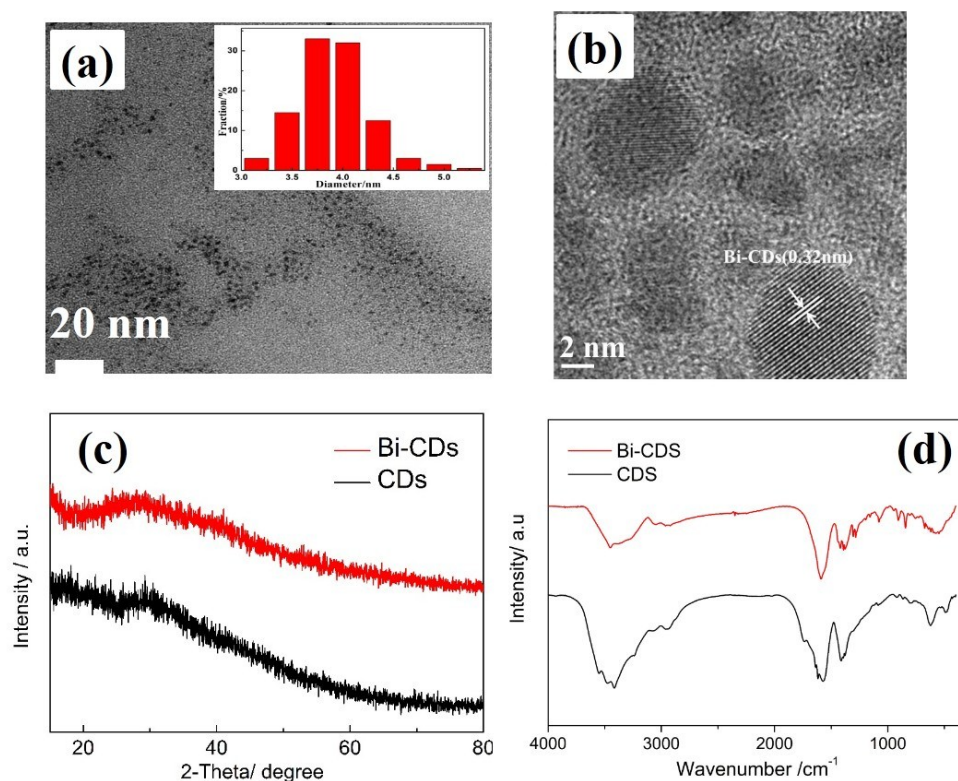

Fig. S1 (a) typical TEM images of Bi-CDs, inset shows the diameter distribution of Bi-CDs, (b) HRTEM images of Bi-CDs, (c) XRD pattern of CDs and Bi-CDs, (d) FT-IR spectra of CDs and Bi-CDs

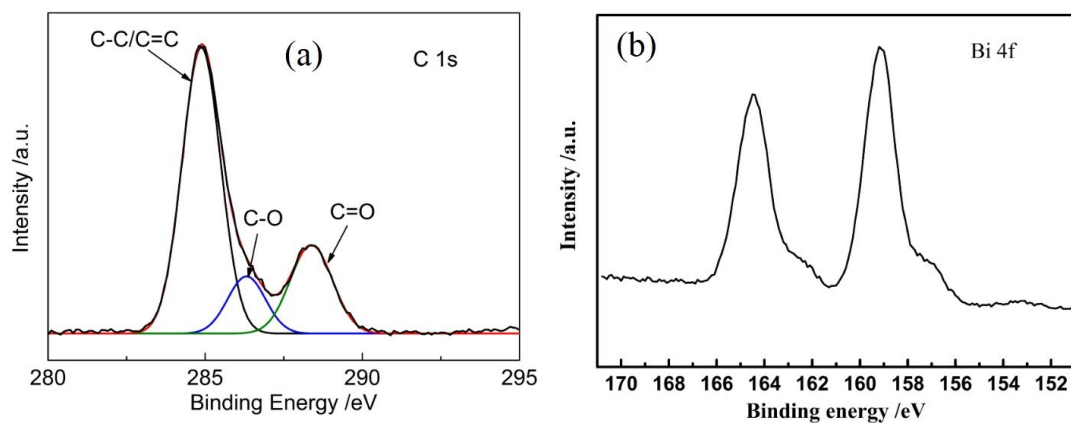

Fig. S2 Magnified XPS spectra of Bi-CDs: (a) C 1s, (b) Bi 4f

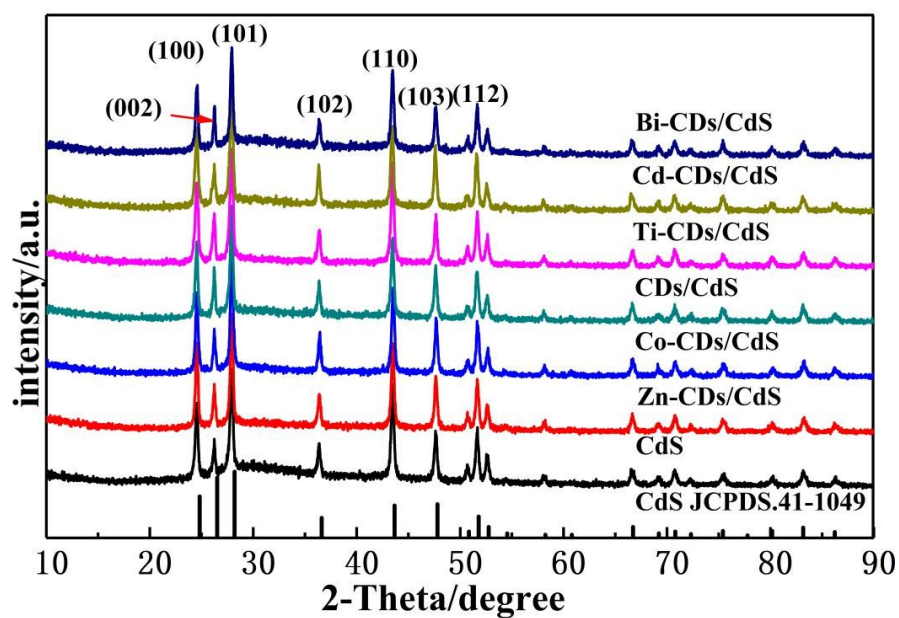

Fig. S3 XRD patterns of CdS, CDs/CdS and metal doped CDs/CdS composites

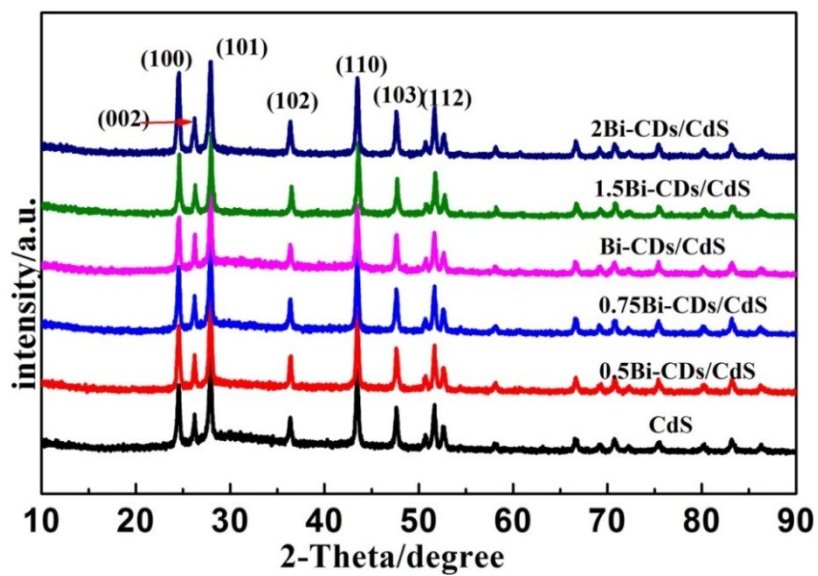

Fig. S4 XRD patterns of Bi-CDs/CdS with different Bi doping amount

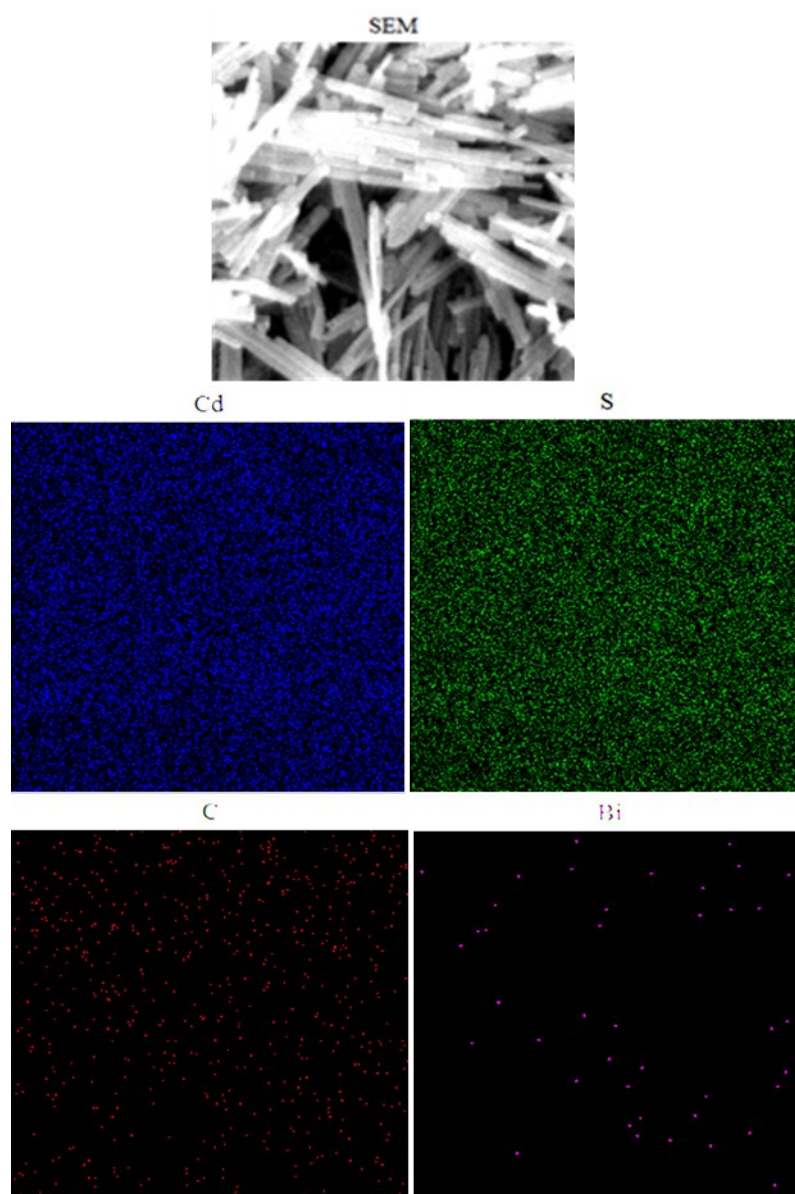

Fig. S5 SEM images and elemental mapping images of Bi-CDs/CdS

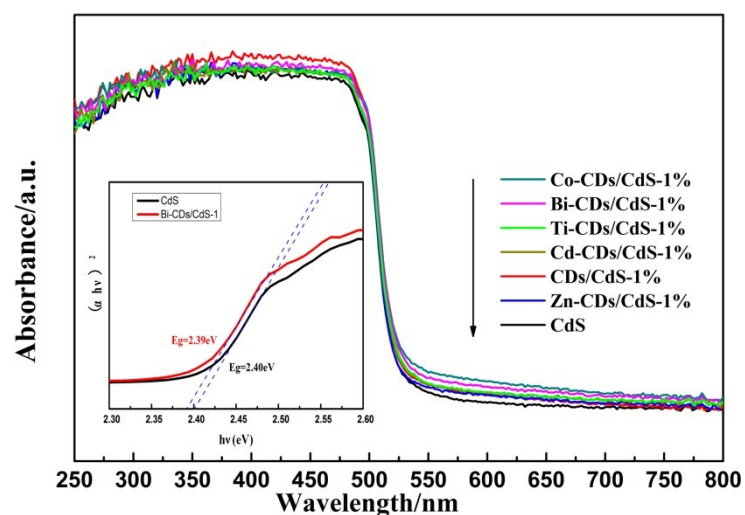

Fig. S6 UV-Vis DRS spectra of CdS, CDs/CdS and different metals doped CDs/CdS.

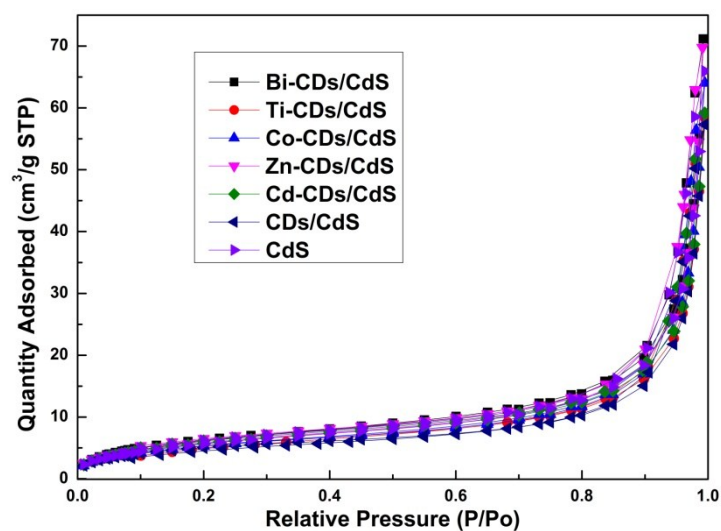

Fig.S7  $N_2$  adsorption-desorption isotherms of CdS, CDs/CdS and metals doped CDs/CdS composites.

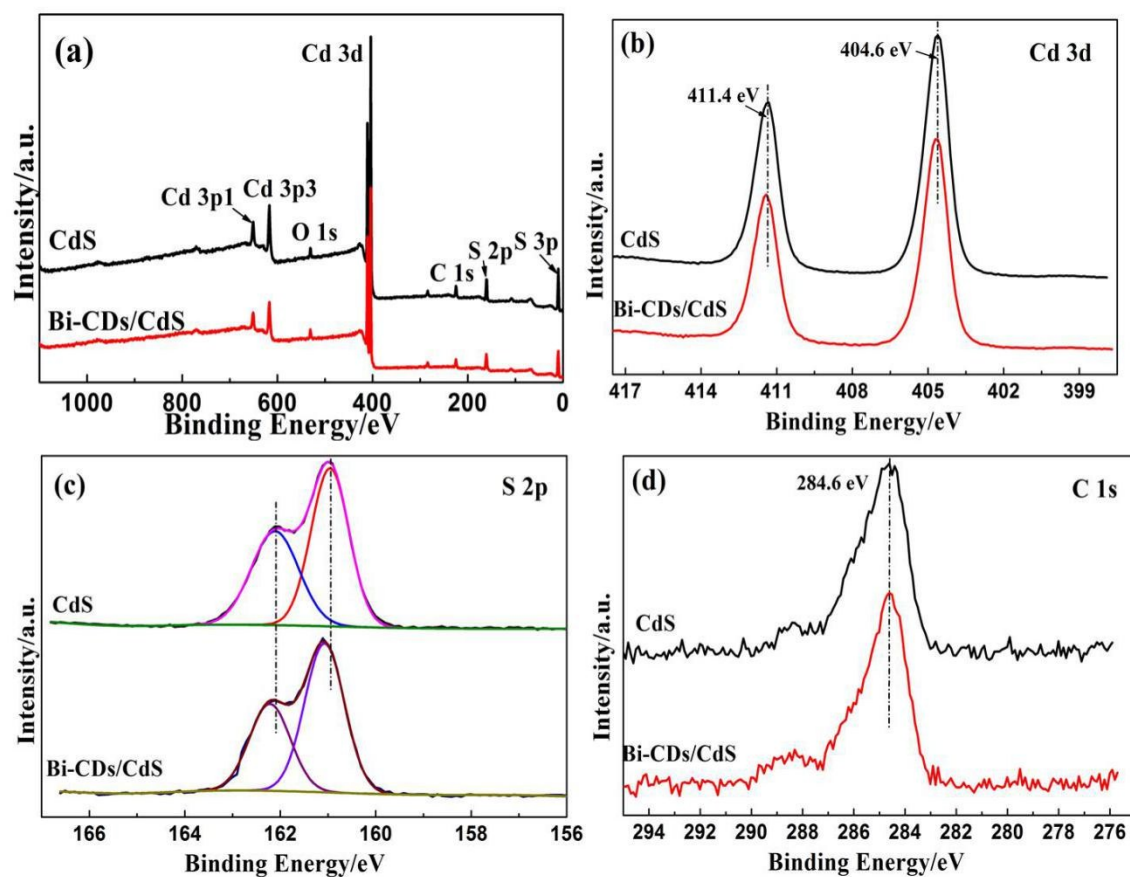

Fig. S8 XPS survey spectra of CdS and Bi-CDs/CdS: (a) survey spectra of CdS and Bi-CDs/CdS, magnified spectrum of (b) Cd 3d peaks, (c) S 2p peaks and (d) C 1s peaks.

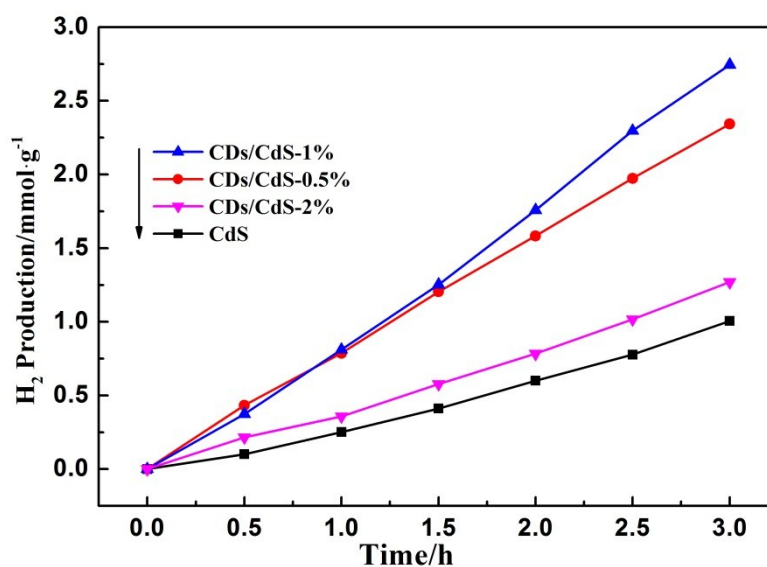

Fig. S9 H<sub>2</sub> evolution profiles of pure CdS and various CDs/CdS composites under visible light irradiation ( $\lambda \geq 420$  nm)



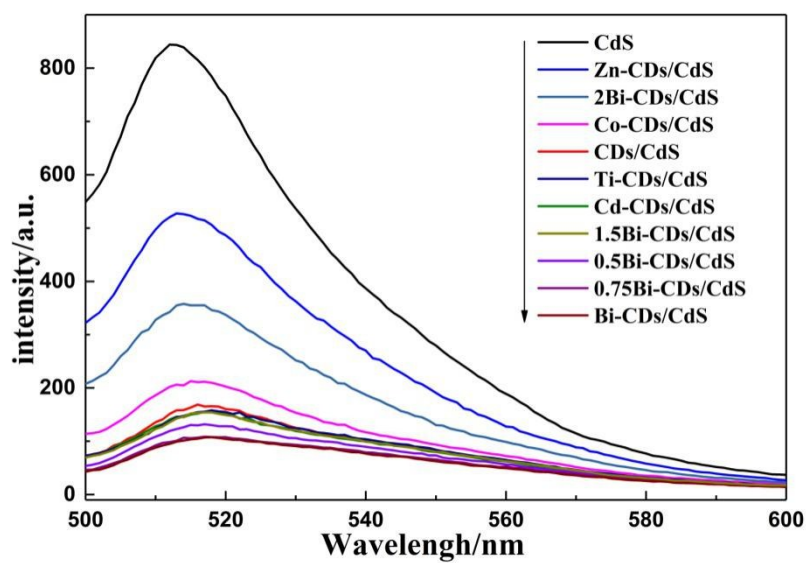

Fig. S10 PL spectra of pure CdS, CDs/CdS and metal doped CDs/CdS composites

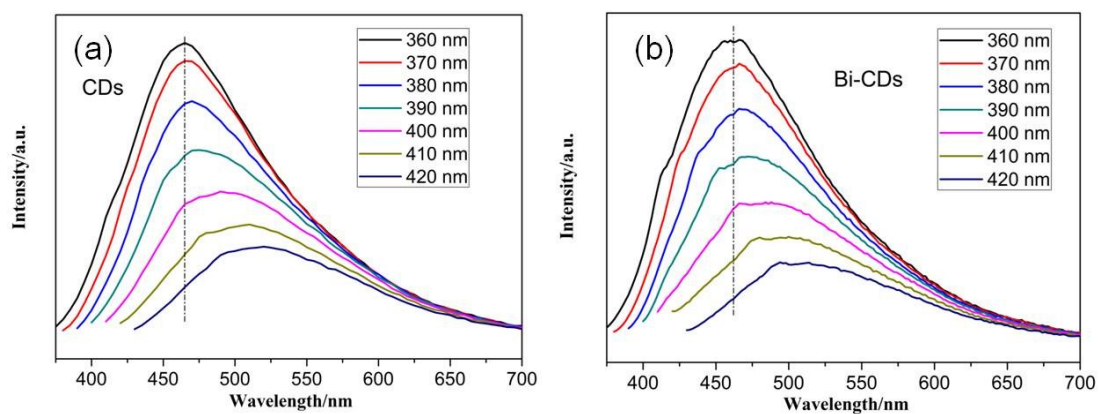

Fig. S11 PL emission spectra of CDs and Bi-CDs: (a) CDs and (b) Bi-CDs

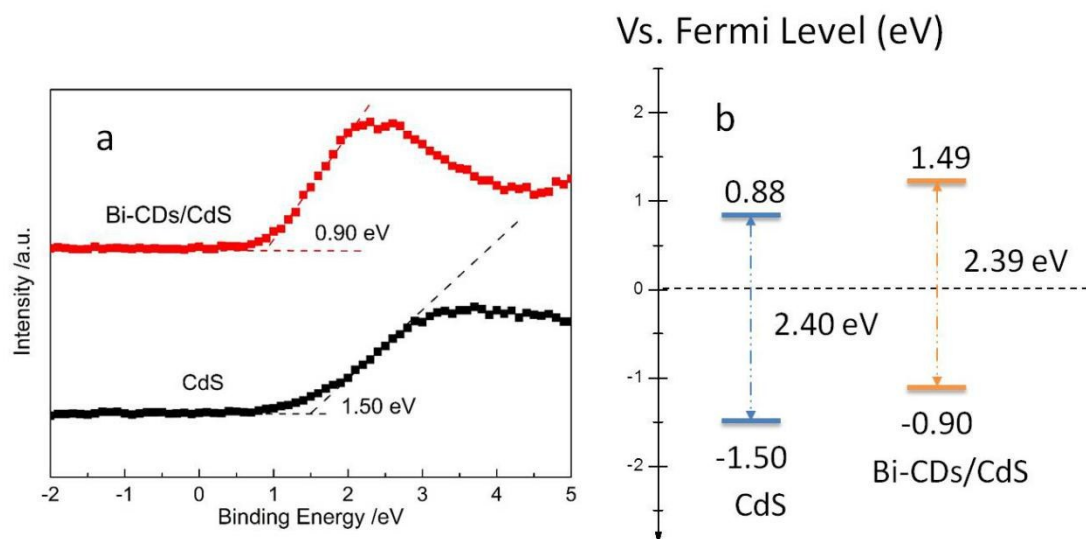

Fig. S12 XPS valence band spectra and band structure diagram for CdS and Bi-CDs/CdS

Table S1 The specific surface area of CdS, CDs/CdS and metals doped CDs/CdS composites.

| Sample                                    | CdS | CDs/CdS | Bi-<br>CDs/CdS | Cd-<br>CDs/CdS | Ti-<br>CDs/CdS | Co-<br>CDs/CdS | Zn-<br>CDs/CdS |
|-------------------------------------------|-----|---------|----------------|----------------|----------------|----------------|----------------|
| Specific surface area (m <sup>2</sup> /g) | 21  | 18      | 23             | 21             | 19             | 19             | 21             |
